# Supplementary material for: Genetic Stability of Bacterial Artificial Chromosome-Derived Human Cytomegalovirus during Culture In Vitro
Source: PubMed Central journal article supplement (PMC4810542; doi:10.1128/jvi.02858-15), 2016-03-28
Supplement: JVI.02858-15_zjv999091533so1.pdf [file JVI.02858-15_zjv999091533so1.pdf]

**Supplementary Table 1. Primer pairs used for PCR based sequencing analysis of mutations acquired by viruses following 5 sequential passages in fibroblasts.**

| Virus                       | Mutation                                                                  | Primer Forward             | Co-ordinates <sup>a</sup> | Primer Reverse              | Co-ordinates <sup>b</sup> |
|-----------------------------|---------------------------------------------------------------------------|----------------------------|---------------------------|-----------------------------|---------------------------|
| TR                          | Δ 6,087 bp from <i>a'</i> into BAC vector                                 | ACC GCT TCC TCT TTT CCC    | 230,704-<br>230,721       | ACT CTC CTG CCT TTC TAT CTT | n/a                       |
|                             | Δ 4,306 bp from <i>a'</i> into BAC vector                                 |                            |                           | ACA GGC CAG AAA GAC ATA ACT | n/a                       |
| TB40-BAC4                   | Δ: 173 bp from <i>a'</i> - BAC vector, entire BAC vector, 446 bp into US7 | CGG GGA ATC AAA CAG ACA CA | 228,655-<br>228,674       | CCC CCA AAC CTA AGT CCA ACA | 846-<br>866               |
| FIX                         | Δ 7,650 bp: Sequence from <i>a'</i> to BAC vector + 7 bp                  | CTT CCT CTT TTC CGC GTC TT | 33,004-<br>33,023         | CCT CCT CCG TTC CGT ATT CT  | 184-<br>203               |
| Me-UL128L <sup>wt</sup>     | Δ 11,039 bp from UL128 – UL139                                            | CCA GCC GTT TGT GTT TCT T  | 176,173-<br>176,191       | GGT TCA TCG TCT TCG TCG T   | 187,545-<br>187,563       |
|                             | Δ 4 bp in UL131A exon 1                                                   | TTC CCG TTG TCA TGC ATC T  | 177,824-<br>177,842       | ACC ATC GAA TCT CAC CTC T   | 178,362-<br>178,380       |
| Me-UL128L <sup>3301</sup>   | Insertion G, substitution C>T in UL128 exon 1                             | CAC CAC AGA ACG CAG ACA A  | 176,695-<br>176,713       | AAC CAA ACC ATC CTC CAA C   | 177,208-<br>177,226       |
|                             | Substitution G>A in UL54-UL55 Intergenic region                           | CAA GGA CAC GGC CAA ACC A  | 81,612-<br>81,630         | ACG CAG GAC AAG GGA CAG A   | 82,098-<br>82,116         |
| Me-UL128L <sup>TB40</sup>   | Δ 2,807 bp in UL130-UL148                                                 | TCT GGT TAT TGG CCT CGG T  | 176,971-<br>176,989       | ATT CCT GCT CCT CAT CTT CT  | 180,229-<br>180,248       |
|                             | Substitution T>A in eGFP                                                  | GCT TCT CGT TGG GGT CTT T  | n/a                       | CCG GTG TGC GTT TGT CTA T   | n/a                       |
| Me-UL128L <sup>G&gt;T</sup> | Substitution: G>C in UL47                                                 | TAA TGT AGA GGT GTC GCG G  | 61,381-<br>61,399         | TTC GGC TAT TAC GGT CTG G   | 62,030-<br>62,048         |
|                             | Substitution: T>A in UL55                                                 | TCA AGA AAA GCC ACC AAC C  | 83,762-<br>83,780         | TTC CAA CAC CCA CAG TAC C   | 84,067-<br>84,085         |
| Me-UL130 <sup>A&gt;G</sup>  | Δ 720 bp in eGFP                                                          | GCT TCT CGT TGG GGT CTT T  | n/a                       | CCG GTG TGC GTT TGT CTA T   | n/a                       |

<sup>a</sup> + <sup>b</sup> – Primer binding region co-ordinates are given relative to sequences of BAC-cloned strains deposited in GenBank: Merlin (GU179001.1) for all Merlin variants; TR (AC146906.1); TB40-BAC4 (EF2999921.1); FIX (AC146907.1). Where n/a, primers bound regions within the BAC-vector or eGFP cassette not included in the sequences deposited in GenBank. The sequences of strains TR-BAC, TB40-BAC4, and FIX-BAC deposited in GenBank commence immediately following the site of BAC vector insertion. The positions of mutations in viruses derived from these clones include sequence at each end of the deposited sequences.
